# Supplementary material for: Graphene oxide aerogels constructed using large or small graphene oxide with different electrical, mechanical and adsorbent properties
Source: Royal Society of Chemistry journal article supplement (doi:10.1039/c5ra26922a), 2016-01-01
Supplement: c5ra26922a1.pdf [file c5ra26922a1.pdf]

Supporting information

**Graphene oxide aerogels constructed by large or small graphene oxide with  
different electrical, mechanical and adsorbent properties**

Yi-Dan Gao<sup>a,b</sup>, Qing-Qiang Kong<sup>a</sup>, Zhuo Liu<sup>a</sup>, Xiao-Ming Li<sup>a</sup>, Cheng-Meng Chen<sup>a,\*</sup>,  
Rong Cai<sup>a,c</sup>

<sup>a</sup> Key Laboratory of Carbon Materials, Institute of Coal Chemistry, Chinese Academy  
of Sciences, Taiyuan 030001, P. R. China

<sup>b</sup> University of Chinese Academy of sciences, Beijing 100049, P. R. China

<sup>c</sup> Academy of Opto-Electronics, Chinese Academy of Sciences, Beijing 100094, P. R.  
China

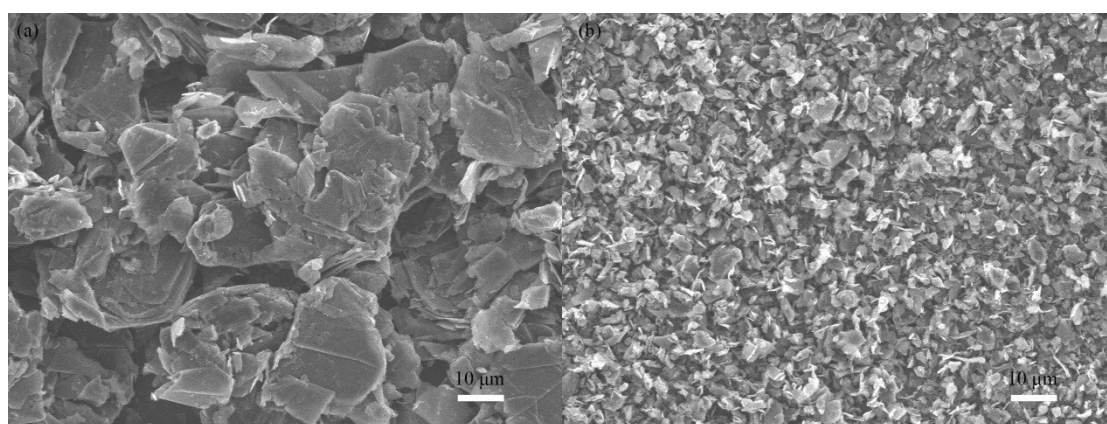

Figure S1 SEM of graphite powder with (a) 325 and (b) 10000 mesh

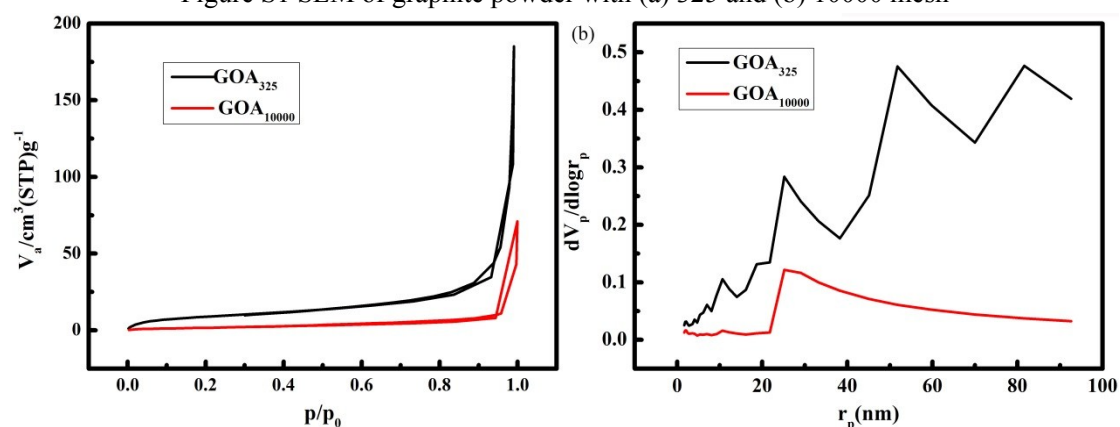

Figure S2 (a) N<sub>2</sub> physical adsorption isotherm, (b) BJH adsorption pore size distribution of  
GOA<sub>325</sub> and GOA<sub>10000</sub>

---

\*Corresponding author. Fax: +86-0351-4049061. E-mail address: [ccm@sxicc.ac.cn](mailto:ccm@sxicc.ac.cn)
